Development 138, 4565 (2011) doi:10.1242/dev.074088  
© 2011. Published by The Company of Biologists Ltd

## Pallial origin of basal forebrain cholinergic neurons in the nucleus basalis of Meynert and horizontal limb of the diagonal band nucleus

**Ana Pombero, Carlos Bueno, Laura Saglietti, Monica Rodenas, Jordi Guimera, Alexandro Bulfone and Salvador Martinez**

There was an error in the ePress version of *Development* **138**, 4315-4326 published on 24 August 2011.

In Fig. 7P, the *P*-values are not given in the legend. For region 2,  $P=0.02$ ; for region 3,  $P=0.003$ .

The final online issue and print copy are correct.

We apologise to authors and readers for this error.
